# Supplementary material for: Proteogenomic Analysis Provides Novel Insight into Genome Annotation and Nitrogen Metabolism in Nostoc sp. PCC 7120
Source: PubMed Central journal article supplement (PMC8557916; doi:10.1128/spectrum.00490-21), 2021-09-15
Supplement: reviewer-comments.pdf [file reviewer-comments.pdf]

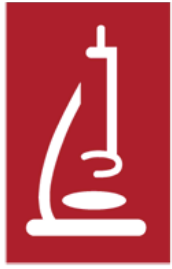

AMERICAN  
SOCIETY FOR  
MICROBIOLOGY

# Microbiology Spectrum

## Proteogenomic analysis provides novel insight into genome annotation and nitrogen metabolism in *Nostoc* sp. PCC 7120

Shengchao Yu, Mingkun Yang, Jie Xiong, Qi Zhang, Xinxin Gao, Wei Miao, and Feng Ge

*Corresponding Author(s): Feng Ge, Institute of Hydrobiology, Chinese Academy of Sciences*

---

### Review Timeline:

|                     |                 |
|---------------------|-----------------|
| Submission Date:    | June 4, 2021    |
| Editorial Decision: | July 12, 2021   |
| Revision Received:  | August 8, 2021  |
| Accepted:           | August 16, 2021 |

---

*Editor: Vincent Denef*

*Reviewer(s): The reviewers have opted to remain anonymous.*

### Transaction Report:

(Note: With the exception of the correction of typographical or spelling errors that could be a source of ambiguity, letters and reports are not edited. The original formatting of letters and referee reports may not be reflected in this compilation.)

**DOI:** <https://doi.org/10.1128/Spectrum.00490-21>

July 12, 2021

Dr. Feng Ge  
Institute of Hydrobiology, Chinese Academy of Sciences  
Wuhan  
China

Re: Spectrum00490-21 (Proteogenomic analysis provides novel insight into genome annotation and nitrogen metabolism in *Nostoc* sp. PCC 7120)

Dear Dr. Feng Ge:

Thank you for submitting your manuscript to Microbiology Spectrum. When submitting the revised version of your paper, please provide (1) point-by-point responses to the issues raised by the reviewers as file type "Response to Reviewers," not in your cover letter, and (2) a PDF file that indicates the changes from the original submission (by highlighting or underlining the changes) as file type "Marked Up Manuscript - For Review Only". Please use this link to submit your revised manuscript - we strongly recommend that you submit your paper within the next 60 days or reach out to me. Detailed information on submitting your revised paper are below.

Link Not Available

Thank you for the privilege of reviewing your work. Below you will find instructions from the Microbiology Spectrum editorial office and comments generated during the review.

The ASM Journals program strives for constant improvement in our submission and publication process. Please tell us how we can improve your experience by taking this quick [Author Survey](#).

Sincerely,

Vincent Deneff

Editor, Microbiology Spectrum

Journals Department  
American Society for Microbiology  
1752 N St., NW  
Washington, DC 20036  
E-mail: [spectrum@asmusa.org](mailto:spectrum@asmusa.org)

Reviewer comments:

Reviewer #1 (Public repository details (Required)):

There is a large dataset of Mass Spectrometry analysis of Nostoc proteins. The authors state that the data are deposited in iProX database with the identifier IPX0002995000. However, the data are not publicly available at present. They should be available upon acceptance

Reviewer #1 (Comments for the Author):

In this work the authors use MS technology to identify proteins in Nostoc in different conditions. The high depth proteomic analysis allows the refinement of the annotation, identify new ORFs and refine the N' terminal of many proteins. In addition, they identify PTMs in a systematic way resulting in the discovery of new PTMs not previously known in bacteria. Both the new annotation and the PTM data represent an invaluable repository of information for the scientific community.

However, there are several major issues to be solved.

1- The authors used as reference the Cyanobase annotation. However, there is a newer annotation in NCBI ([https://www.ncbi.nlm.nih.gov/nucore/NC\\_003272.1](https://www.ncbi.nlm.nih.gov/nucore/NC_003272.1)). Some of the ORFs the authors claim to have "discovered" are annotated in NCBI, as detailed below. This does not represent a methodological problem for the analysis of the MS data because in addition to the Cyanobase they use the six-frame genome database. But they should screen their GSSP against NCBI. In fact, in lines 287-289 they mention that the "novel" refined model for alr5269 was already reported in NCBI.

2-The results of this work allows for an updated annotation of ORFs in Nostoc. This is one of the most useful contributions of this work. However, the updated annotation is not easily available from the data presented. The authors should present the annotation as a table similar to table S1E with two additional columns: the updated coordinates for each ORF, and the Refseq new name of each ORF, if available.

3-There is an overall confusion between newly identified proteins and confirmation of proteins already annotated.

4-The "new" genes in Fig 5B, C and updated 5' end in 5E are already annotated in RefSeq.

5- There is disagreement in Fig. 6 between transcriptomic and RT-PCR. An example out of several: RNAseq: NG-2 increases at 12 h; RT-PCR: NG-2 decrease at 12 h.

6-Furthermore, there is disagreement between RNA data in Fig. 6 and protein quantification data in Fig.7. For instance, NG-7 protein amount increase upon nitrogen deprivation, but both RNASeq and RT-PCR indicate that there is a reduction in the amount of mRNA. The authors should at least discuss these discrepancies.

Other points

Line 41: photosynthesis

Lines 171-173: When describing the shared proteins identified they should mention in the text the three heterocyst specific proteins with split genes that are in Table S2.

Line 182-185: I find this speculation baseless.

Lines 199-203. The statements in this paragraph are not relevant because the authors do not perform a functional enrichment analysis of the different PTMs. Table 4B reflects just the general distribution of proteins.

Line 216-217. The PTM data are clearly very interesting, novel, and are one of the main strengths of the paper. From figure 4C it seems that at least propionyl and crotonyl modifications are altered in the -N sample for some proteins. This is a very interesting result that should be highlighted in the text.

Line 267: Insert here reference 50 so that the reader knows what RNASeq data are used.

Line 273. ¿Is "transcriptomic evidence" here the same than "RNA-Seq evidence" in 267?

Line 336 NG-1, NG2-and NG-7 are already present in NCBI RefSeq. Only NG-6 is novel.  
Lines 361-363, As indicated above in relation to lines 182-185, this speculation is baseless. I don't understand the meaning of "weaker protein coding potential".

Line 45. References 42 and 33 are wrong.

Line 46. Rather than reference 66, the following reference could be more appropriate: Elhai, J., and Khudyakov, I. (2018). Ancient association of cyanobacterial multicellularity with the regulator HetR and an RGSGR pentapeptide-containing protein (PatX). *Mol Microbiol.* doi:10.1111/mmi.14003 or Khudyakov, I., Gladkov, G., and Elhai, J. (2020). Inactivation of Three RG(S/T)GR Pentapeptide-Containing Negative Regulators of HetR Results in Lethal Differentiation of *Anabaena* PCC 7120. *Life* 10. doi:10.3390/life10120326.

Line 410. NG-20 is not novel. In fact, the authors refer to a 2018 paper [67] about this protein. Several of the "novel" ORFs in Table S6 are already annotated in Refseq.

Paragraph starting at line 412. The extended discussion on proteins related to heavy metal metabolism (including fig. 8) is rather out of the main focus of the paper, could be deleted or strongly reduced.

Table S1E has a recurrent typo in column D: putative "proteion".

References should be carefully reviewed. References 10 and 41 are duplicated. References 66 and 101 are incomplete or wrongly formatted.

Reviewer #2:

In addition to the detailed comments above, another expert in the field raised concerns regarding the use of this strain, claiming it is a mutant and highly mutable. Please comment on the time this strain has been in culture since the initial genome sequence and consider this in your interpretation of differences between the initially deposited sequence annotation and the update you provide.

Staff Comments:

### **Preparing Revision Guidelines**

To submit your modified manuscript, log onto the eJP submission site at <https://spectrum.msubmit.net/cgi-bin/main.plex>. Go to Author Tasks and click the appropriate manuscript title to begin the revision process. The information that you entered when you first submitted the paper will be displayed. Please update the information as necessary. Here are a few examples of required updates that authors must address:

- Point-by-point responses to the issues raised by the reviewers in a file named "Response to Reviewers," NOT IN YOUR COVER LETTER.
- Upload a compare copy of the manuscript (without figures) as a "Marked-Up Manuscript" file.
- Each figure must be uploaded as a separate file, and any multipanel figures must be assembled into one file.
- Manuscript: A .DOC version of the revised manuscript
- Figures: Editable, high-resolution, individual figure files are required at revision, TIFF or EPS files are preferred

For complete guidelines on revision requirements, please see the Instructions to Authors at [link to

page]. **Submissions of a paper that does not conform to Microbiology Spectrum guidelines will delay acceptance of your manuscript.**

Please return the manuscript within 60 days; if you cannot complete the modification within this time period, please contact me. If you do not wish to modify the manuscript and prefer to submit it to another journal, please notify me of your decision immediately so that the manuscript may be formally withdrawn from consideration by Microbiology Spectrum.

If you would like to submit an image for consideration as the Featured Image for an issue, please contact Spectrum staff.

If your manuscript is accepted for publication, you will be contacted separately about payment when the proofs are issued; please follow the instructions in that e-mail. Arrangements for payment must be made before your article is published. For a complete list of **Publication Fees**, including supplemental material costs, please visit our [website](#).

Corresponding authors may [join or renew ASM membership](#) to obtain discounts on publication fees. Need to upgrade your membership level? Please contact Customer Service at [Service@asmusa.org](mailto:Service@asmusa.org).

Thank you for submitting your paper to Microbiology Spectrum.

## RESPONSE TO REVIEWERS

---

**Manuscript ID:** Spectrum00490-21

**Manuscript Title:** Proteogenomic analysis provides novel insight into genome annotation and nitrogen metabolism in *Nostoc* sp. PCC 7120

**Professor Vincent Denef**

**Editor**

**Microbiology Spectrum**

Dear Prof. Denef:

We greatly appreciate your decision to allow us to submit the revised manuscript. We sincerely thank the editor and reviewers for the careful assessment of our manuscript and their thoughtful and constructive comments. Based on the reviewers' comments, we have revised the manuscript. In what follows, we present a point-by-point answer to the reviewers' comments. Our responses are marked with "**Author reply**".

**Reviewer #1 (Public repository details (Required)):**

*There is a large dataset of Mass Spectrometry analysis of Nostoc proteins. The authors state that the data are deposited in iProX database with the identifier IPX0002995000. However, the data are not publicly available at present. They should be available upon acceptance.*

**Authors reply:** We appreciate the valuable comments from the reviewer. We have submitted the data to iProX database with the identifier IPX0002995000 and they are publicly available now.

**Reviewer #1 (Comments for the Author):**

In this work the authors use MS technology to identify proteins in *Nostoc* in different conditions. The high depth proteomic analysis allows the refinement of the annotation, identify new ORFs and refine the N' terminal of many proteins. In addition, they

identify PTMs in a systematic way resulting in the discovery of new PTMs not previously known in bacteria. Both the new annotation and the PTM data represent an invaluable repository of information for the scientific community.

However, there are several major issues to be solved.

*1- The authors used as reference the Cyanobase annotation. However, there is a newer annotation in NCBI ([https://www.ncbi.nlm.nih.gov/nucore/NC\\_003272.1](https://www.ncbi.nlm.nih.gov/nucore/NC_003272.1)). Some of the ORFs the authors claim to have "discovered" are annotated in NCBI, as detailed below. This does not represent a methodological problem for the analysis of the MS data because in addition to the Cyanobase they use the six-frame genome database. But they should screen their GSSP against NCBI. In fact, in lines 287-289 they mention that the "novel" refined model for *alr5269* was already reported in NCBI.*

**Authors reply:** We appreciate the comments of the reviewer. At present, there are three genome assemblies for *Nostoc* sp. PCC 7120 published in NCBI database. Their RefSeq assembly accessions are GCF\_000009705.1 (released in 2004, annotated 6132 proteins), GCF\_003990585.1 (released in 2019, annotated 5900 proteins) and GCF\_014696735.1 (released in 2020, annotated 5732 proteins), respectively. Cyanobase annotation was completed by *Takakazu* with reference to GCF\_000009705.1 (1), which has been widely used as a reference database in the functional genomic studies of *Nostoc* sp. PCC 7120. According to the comments of the reviewer, we performed BLAST analysis of these novelties discovered in this study with the 2019 and 2020 version of genomic annotations (accession: GCF\_003990585.1 and GCF\_014696735.1) collected in the NCBI database, respectively. The sequence alignment results have refreshed in the **Table S6D** and **S6E**. Of which, four novel genes (NG-3, -7, -15, -20) and twenty-three revised genes shared identical sequence with genes annotated in the latest genome of *Nostoc* sp. PCC 7120 (**Table S6D & S6E**). For the revised gene model of *alr5269*, it has been annotated in the genome assembly of 2020 version (100% sequence similarity with MBD2272597.1). While compared with the gene model annotated in the 2019 version, it has 2 amino acids extension at the N-terminus. (**Figure 5D**).

*2-The results of this work allow for an updated annotation of ORFs in Nostoc. This is one of the most useful contributions of this work. However, the updated annotation is not easily available from the data presented. The authors should present the annotation as a table similar to table S1E with two additional columns: the updated coordinates for each ORF, and the Refseq new name of each ORF, if available.*

**Authors reply:** We thank the reviewer for this constructive comment. The updated coordinates for each ORF have been displayed in the column H-J of **Table S6B** and **Table S6C**. And the Refseq new names of each ORF have been updated in **Table S6D** and **S6E**.

*3-There is an overall confusion between newly identified proteins and confirmation of proteins already annotated.*

**Authors reply:** We apologize for this lack of clarity. In this study, all raw MS data were analyzed against two databases: (I) Cyanobase database, (II) a six-frame translated genome database of *Nostoc* sp. PCC 7120. The identified peptides exclusively matching the six-frame genome database were designated as genome search-specific peptides (GSSPs). And the GSSPs were mapped to the unique genomic locus to identify open reading frames (ORFs) using BLAST. ORFs that were only mapped to the genome regions without overlap with any known gene models were designated as novel protein-coding genes, that is the newly identified proteins (NG-1~NG-26 are the newly identified proteins in this study). ORFs that partially overlapped with the annotated protein-coding regions were designated as revised gene models (NG-27~NG-101 are the revised gene models in this study). While the identified unique peptides matching with the six-frame genome database and Cyanobase database were used as confirmation of proteins already annotated (The 5519 proteins identified in the proteomic landscape of *Nostoc* 7120 are the confirmation of proteins already annotated in Cyanobase). We have marked in the in the revised manuscript (**Line 125 and Line 260**) in response to the comments of the reviewer.



*4-The "new" genes in Fig 5B, C and updated 5' end in 5D are already annotated in RefSeq.*

**Authors reply:** Thanks for the comments. As mentioned above, we have performed sequence alignment with the genome annotation of 2019 version and 2020 version and the results have showed in the **Table S6D** and **S6E**. As showed in the table, NG-15 does exist in both the 2019 and 2020 versions of genome annotations (**Figure 5B**). While NG-20 is only annotated in the 2020 versions of genome assembly (**Figure 5C**). For the revised gene model of alr5269, it has been annotated in the genome assembly of 2020 version (100% sequence similarity with MBD2272597.1). When compared with the gene model annotated in the 2019 version, it has 2 amino acids extension at the N-terminus (**Figure 5D**). As the suggestion of the reviewer, we have revised the **Figure 5** and its legend. We add 2019 annotation and 2020 annotation information in the revised **Figure 5** and explain in the legend that the accession with 2019 annotation and 2020 annotation represent that the sequence existed in the *Nostoc* 7120 genome annotation of 2019 version or 2020 version in NCBI database, respectively.

*5- There is disagreement in Fig. 6 between transcriptomic and RT-PCR. An example out of several: RNAseq: NG-2 increases at 12 h; RT-PCR: NG-2 decrease at 12 h.*

**Authors reply:** We appreciate the comment of the reviewer. We have also noticed the disagreement between transcriptomic and RT-PCR. We believe that the reasons for this divergence may be due to the different samples, different detection and analysis methods, shorter transcripts, and lower expression levels, etc (2, 3). Therefore, **Figure 6** was mainly used to show these new genes can be detected at the mRNA level and differentially expressed under nitrogen deficiency. We have mentioned this disagreement in the revised manuscript in response to the comments of the reviewers. (**Line 317-318**)

*6-Furthermore, there is disagreement between RNA data in Fig. 6 and protein quantification data in Fig.7. For instance, NG-7 protein amount increase upon*

*nitrogen deprivation, but both RNASeq and RT-PCR indicate that there is a reduction in the amount of mRNA. The authors should at least discuss these discrepancies.*

**Authors reply:** We thank the reviewer for this constructive suggestion. It is widely accepted mRNA level usually has a poor correlation with the corresponding protein level (4, 5). Perhaps substantial regulatory processes, including post-transcriptional, translational and degradation regulation, contribute at least as much as transcription itself in the determination of protein concentrations. We have discussed it as the suggestion of the reviewers in the revised manuscript. (**Line 349-352**)

Other points:

*Line 41: photosynthesis*

**Authors reply:** We are sorry for the mistake. We have revised the spelling, and the whole manuscript has been carefully checked.

*Lines 171-173: When describing the shared proteins identified they should mention in the text the three heterocyst specific proteins with split genes that are in Table S2.*

**Authors reply:** We appreciate the reviewer's comment. We have added it in the revised manuscript (**Line 175-177**) as the reviewer's suggestion.

*Line 182-185: I find this speculation baseless.*

**Authors reply:** We apologize for this lack of clarity. We have deleted the controversial speculation in the revised manuscript.

*Lines 199-203. The statements in this paragraph are not relevant because the authors do not perform a functional enrichment analysis of the different PTMs. Table 4B reflects just the general distribution of proteins.*

**Authors reply:** We have performed a functional enrichment analysis of the different PTMs in response to the reviewer's comment. We have provided the result as an alternative to **Figure 4B**. The relevant statements have also been revised in manuscript (**line 202-205**).

*Line 216-217. The PTM data are clearly very interesting, novel, and are one of the main strengths of the paper. From figure 4C it seems that at least propionyl and crotonyl modifications are altered in the -N sample for some proteins. This is a very interesting result that should be highlighted in the text.*

**Authors reply:** We thank the reviewer for the useful suggestion. As advised, we highlighted the result in the revised manuscript. (**Line 218-221**)

*Line 267: Insert here reference 50 so that the reader knows what RNASeq data are used.*

**Authors reply:** We thank the reviewer for the valuable suggestion. The transcriptome data used in this study were all derived from reference 50. We have added this specification to the RNA-seq analysis section of the materials and methods. (**Line 588-590**)

*Line 273. Is "transcriptomic evidence" here the same than "RNA-Seq evidence" in 267?*

**Authors reply:** We apologize for this lack of clarity. The transcriptome data used in this study were all retrieved from NCBI database <http://www.ncbi.nlm.nih.gov/sra> (accession: SRX039128, SRX039130 and SRX039131) submitted by Flaherty et al [50]. We have added this specification to the RNA-seq analysis section of the materials and methods. (**Line 588-590**)

*Line 336 NG-1, NG-2 and NG-7 are already present in NCBI RefSeq. Only NG-6 is novel.*

**Authors reply:** We appreciate the reviewer's comment. As mentioned above, there are discrepancies between different versions of genome annotation. We have showed the sequence alignment of novel genes in **Table S6D**. As showed in the table, only NG-7 is consistent with the genome annotation of 2019 and 2020 version. Although NG-1 also has homologous sequences, its N-terminus is 10 amino acids shorter than

that in the NCBI RefSeq. While neither NG-2 nor NG-6 has been annotated in the NCBI RefSeq by referring to the BLAST analysis.

*Lines 361-363, As indicated above in relation to lines 182-185, this speculation is baseless. I don't understand the meaning of "weaker protein coding potential".*

**Authors reply:** We apologize for the lack of clarity. In the present *Nostoc* 7120 genome annotation, a large number (3,525 of 6,135) of the previously predicted protein-coding genes are annotated as hypothetical protein or unknown protein. These proteins only showed similarity to hypothetical proteins, or even no significant similarity to any known proteins (1). The expression of these predicted protein-coding genes remains to be verified. While in our proteomic identification, 438 out of 616 unidentified proteins were annotated as unknown protein or hypothetical protein. Of which, only 232 putative proteins (about 54%) have functional features according to Gene Ontology (GO), COG, KEGG pathway and Pfam annotations (**Table S2C**). We speculated that these unidentified predicted encoding genes may not exist. We have deleted the controversial speculation in the revised manuscript as the reviewer's suggestion.

*Line 405. References 42 and 33 are wrong.*

**Authors reply:** We apologize for the lack of clarity. 42 and 33 here refer to the number of putative proteins, not the reference number. We have revised it in the manuscript to avoid misunderstanding. (**Line 419**)

*Line 406. Rather than reference 66, the following reference could be more appropriate: Elhai, J., and Khudyakov, I. (2018). Ancient association of cyanobacterial multicellularity with the regulator HetR and an RGSGR pentapeptide-containing protein (PatX). Mol Microbiol. doi:10.1111/mmi.14003 or Khudyakov, I., Gladkov, G., and Elhai, J. (2020). Inactivation of Three RG(S/T)GR Pentapeptide-Containing Negative Regulators of HetR Results in Lethal Differentiation of Anabaena PCC 7120. Life 10. doi:10.3390/life10120326.*

**Authors reply:** We thank the reviewer for the comment and have substituted the references according to reviewer's suggestion.

*Line 410. NG-20 is not novel. In fact, the authors refer to a 2018 paper [67] about this protein. Several of the "novel" ORFs in Table S6 are already annotated in Refseq.*

**Authors reply:** We appreciate the reviewer's comment. There are three different versions of genome annotations for *Nostoc* sp. PCC 7120 published in NCBI database as mentioned above. In this study, we select the Cyanobase annotation because it has been widely used as a reference database. As showed in **Table S6D** and **Figure 5C**, we also acknowledge that NG-20 is present in the latest genome annotation. While this protein is missing in the Cyanobase database and 2019 version of genome annotation. The sequence alignment analysis of other novelties with genes annotated in different versions of genome are also summarized in **Table S6D** and **S6E**.

*Paragraph starting at line 412. The extended discussion on proteins related to heavy metal metabolism (including fig. 8) is rather out of the main focus of the paper, could be deleted or strongly reduced.*

**Authors reply:** We thank the reviewer for this constructive suggestion. We have strongly reduced this discussion section in the revised manuscript.

*Table S1E has a recurrent typo in column D: putative "proteion".*

**Authors reply:** Thanks for pointing out these mistakes and we have corrected them in the revised manuscript.

*References should be carefully reviewed. References 10 and 41 are duplicated. References 66 and 101 are incomplete or wrongly formatted.*

**Authors reply:** We are sorry for the mistakes. We have corrected them, and the whole revised manuscript has been carefully checked.

**Reviewer #2:**

*In addition to the detailed comments above, another expert in the field raised concerns regarding the use of this strain, claiming it is a mutant and highly mutable. Please comment on the time this strain has been in culture since the initial genome sequence and consider this in your interpretation of differences between the initially deposited sequence annotation and the update you provide.*

**Authors reply:** We highly appreciate the comment raised by the reviewer. *Nostoc* sp. PCC 7120 is commonly used as a model strain for studying cell differentiation and multicellular pattern. At present, the widely used substrains mainly from either University of Chicago, Michigan State University, or the PCC. And the three substrains were reported to have undergone microevolution by comparative genome analysis, including single nucleotide polymorphisms (SNPs), small insertion/deletions (indels; 1 to 3 bp), fragment deletions, and transpositions [4] (**Table R1-2**). The genomic locations of novelties identified in this study were listed in **Table R3**. By comparing the regions of the novelties with the sequence mutations reported by *Xu* et al, no overlap region was found. In addition, genome microevolution events have also been reported in other organisms, such as *Escherichia coli*, *Bacillus subtilis*, *Synechocystis* sp. PCC 6803, etc (6-8). The genome reannotations based on proteogenomics analysis, similar to this study, have also been performed in these organisms (9-11).

The substrain used in this study was obtained in 2017 from Jindong Zhao (Peking University), who had brought it from the University of Chicago. The Cyanobase database annotation also refers to the genome sequencing of the strain from University of Chicago. Therefore, although the strain has undergone microevolution during the cultivation, these novelties identified in this study should not be caused by these mutations in view of the comparing analysis above and the methodology employed in this study is also reasonable.

**Table R1. SNPs in *Nostoc* sp. PCC 7120 substrains IHB and HAU**

| Plasmid | Position | Reference<br>base | IHB | depth | HAU | depth | Gene (s) | Region |
|---------|----------|-------------------|-----|-------|-----|-------|----------|--------|
|---------|----------|-------------------|-----|-------|-----|-------|----------|--------|

|       |        |   |     |           |   |     |                  |            |
|-------|--------|---|-----|-----------|---|-----|------------------|------------|
| Alpha | 3289   | C | T   | 139       | C | \   | all7005, asr7006 | Intergenic |
| Alpha | 8242   | T | T   | \         | C | 125 | all7011          | ORF        |
| Alpha | 25546  | T | T   | \         | G | 159 | all7027          | ORF        |
| Alpha | 49297  | A | A   | \         | G | 353 | alr7063          | ORF        |
| Alpha | 72155  | T | T   | \         | C | 310 | all7084          | ORF        |
| Alpha | 77566  | T | G   | 1,822     | T | \   | alr7089          | ORF        |
| Alpha | 85981  | A | G   | 2,144     | G | 225 | all7098          | ORF        |
| Alpha | 92804  | G | A/G | 1,554/438 | G | \   | all7106, alr7107 | Intergenic |
| Alpha | 125193 | T | T   | \         | C | 132 | alr7129          | ORF        |
| Alpha | 147600 | G | G   | \         | A | 141 | asr7143          | ORF        |
| Alpha | 157737 | G | A   | 2,081     | G | \   | alr7157          | ORF        |
| Alpha | 161185 | C | T   | 1,205     | C | \   | all7160, all7161 | Intergenic |
| Alpha | 183584 | C | T   | 2,016     | T | 140 | all7185          | ORF        |
| Alpha | 197224 | T | T   | \         | C | 188 | all7191          | ORF        |
| Alpha | 216050 | G | C   | 1,931     | G | \   | alr7206          | ORF        |
| Alpha | 216051 | T | C   | 1,914     | T | \   | alr7206          | ORF        |
| Alpha | 216052 | T | C   | 1,895     | T | \   | alr7206          | ORF        |
| Alpha | 231547 | A | G   | 2,049     | G | 155 | all7218, alr7219 | Intergenic |
| Alpha | 268895 | T | T   | \         | C | 323 | alr7249          | ORF        |
| Alpha | 289163 | A | G   | 1,827     | G | 139 | all7275          | ORF        |
| Alpha | 300552 | A | G   | 1,909     | G | 227 | alr7294, alr7295 | Intergenic |
| Alpha | 300902 | A | G   | 1,879     | G | 199 | alr7295          | ORF        |
| Alpha | 310851 | G | G   | \         | A | 175 | alr7299          | ORF        |
| Alpha | 326058 | T | T   | \         | C | 210 | alr7304          | ORF        |
| Alpha | 364530 | G | G   | \         | A | 224 | asr7330          | ORF        |
| Alpha | 407466 | G | A   | 1,983     | G | \   | asr7385, alr7386 | Intergenic |
| Beta  | 51863  | G | A   | 483       | G | \   | alr7555          | ORF        |
| Gamma | 23623  | T | C   | 1,400     | C | 310 | all8023          | ORF        |
| Gamma | 56266  | C | T   | 2,065     | C | \   | asl8049, asl8050 | Intergenic |

|            |        |   |   |       |   |     |                  |            |
|------------|--------|---|---|-------|---|-----|------------------|------------|
| Gamma      | 56708  | C | T | 2,062 | C | \   | asl8049, asl8050 | Intergenic |
| Gamma      | 96179  | A | A | \     | G | 439 | all8083, asl8084 | Intergenic |
| Delta      | 32318  | A | G | 446   | G | 493 | alr8542, alr8543 | Intergenic |
| Zeta       | 4713   | A | C | 1,101 | C | 364 | alr9504, alr9505 | Intergenic |
| Chromosome | 99793  | C | C | \     | T | 439 | alr0094          | ORF        |
| Chromosome | 136013 | T | T | \     | C | 383 | alr0132, all0131 | Intergenic |
| Chromosome | 141747 | A | A | \     | G | 414 | asl0137, all0138 | Intergenic |
| Chromosome | 165432 | A | A | \     | G | 427 | all0160          | ORF        |
| Chromosome | 172755 | T | T | \     | C | 295 | all0167          | ORF        |
| Chromosome | 176465 | G | A | 414   | G | \   | all0168          | ORF        |
| Chromosome | 228394 | T | C | 398   | C | 375 | all0211          | ORF        |
| Chromosome | 240374 | A | G | 439   | G | 449 | alr0223          | ORF        |
| Chromosome | 254220 | A | G | 309   | A | \   | alr0236, alr0237 | Intergenic |
| Chromosome | 335391 | T | T | \     | C | 383 | alr0295, all0293 | Intergenic |
| Chromosome | 367421 | A | G | 498   | A | \   | all0323          | ORF        |
| Chromosome | 388027 | C | T | 474   | C | \   | alr0336          | ORF        |
| Chromosome | 411083 | A | G | 491   | G | 473 | all0355          | ORF        |
| Chromosome | 461600 | A | A | \     | G | 430 | all0394          | ORF        |
| Chromosome | 635525 | A | A | \     | G | 467 | alr0543, all0542 | Intergenic |
| Chromosome | 663464 | A | G | 522   | G | 345 | alr0568          | ORF        |
| Chromosome | 676298 | G | G | \     | T | 337 | asr0581, alr0582 | Intergenic |
| Chromosome | 703818 | C | C | \     | T | 393 | all0606          | ORF        |
| Chromosome | 791750 | T | C | 478   | T | \   | all0684          | ORF        |
| Chromosome | 804565 | A | G | 504   | A | \   | asr0697          | ORF        |
| Chromosome | 838235 | G | G | \     | A | 371 | alr0719          | ORF        |
| Chromosome | 850685 | T | T | \     | C | 421 | all0729          | ORF        |
| Chromosome | 873358 | T | C | 568   | T | \   | alr0751, alr0752 | Intergenic |
| Chromosome | 964001 | G | G | \     | A | 427 | alr0838          | ORF        |
| Chromosome | 965275 | T | C | 461   | C | 454 | alr0840, all0839 | Intergenic |



|            |         |   |     |        |   |     |                  |            |
|------------|---------|---|-----|--------|---|-----|------------------|------------|
| Chromosome | 1105390 | C | T   | 524    | C | \   | alr0950, alr0951 | Intergenic |
| Chromosome | 1164680 | C | C   | \      | T | 299 | all0993          | ORF        |
| Chromosome | 1181589 | T | C   | 441    | C | 389 | all1011          | ORF        |
| Chromosome | 1197843 | T | C   | 477    | C | 404 | all1027          | ORF        |
| Chromosome | 1213151 | T | T   | \      | C | 43  | alr1042, alr1041 | Intergenic |
| Chromosome | 1218823 | C | T/C | 355/89 | C | \   | all1047          | ORF        |
| Chromosome | 1233544 | G | G   | \      | A | 462 | all1058          | ORF        |
| Chromosome | 1234860 | A | G   | 472    | A | \   | all1059          | ORF        |
| Chromosome | 1260414 | A | G   | 480    | G | 416 | all1076          | ORF        |
| Chromosome | 1276768 | A | G   | 535    | G | 474 | all1089          | ORF        |
| Chromosome | 1291183 | A | G   | 409    | G | 421 | all1101          | ORF        |
| Chromosome | 1297308 | C | C   | \      | T | 439 | alr1108          | ORF        |
| Chromosome | 1297479 | A | G   | 431    | G | 373 | alr1108          | ORF        |
| Chromosome | 1313571 | T | T   | \      | C | 416 | alr1121          | ORF        |
| Chromosome | 1326135 | C | T   | 468    | C | \   | alr1128          | ORF        |
| Chromosome | 1384940 | G | G   | \      | A | 414 | all1177          | ORF        |
| Chromosome | 1425785 | T | T   | \      | C | 418 | all1210          | ORF        |
| Chromosome | 1449194 | A | G   | 462    | G | 432 | all1227          | ORF        |
| Chromosome | 1467026 | T | C   | 548    | C | 446 | alr1236          | ORF        |
| Chromosome | 1469539 | T | T   | \      | C | 491 | all1237, alr1238 | Intergenic |
| Chromosome | 1473304 | A | G   | 449    | A | \   | alr1240          | ORF        |
| Chromosome | 1503377 | A | G   | 532    | G | 389 | alr1266          | ORF        |
| Chromosome | 1511804 | G | G   | \      | A | 425 | all1272          | ORF        |
| Chromosome | 1524963 | G | A   | 497    | A | 407 | all1281          | ORF        |
| Chromosome | 1526058 | T | C   | 479    | C | 436 | alr1282          | ORF        |
| Chromosome | 1589551 | G | G   | \      | A | 392 | all1338          | ORF        |
| Chromosome | 1603350 | G | A   | 378    | A | 429 | alr1348          | ORF        |
| Chromosome | 1611061 | A | G   | 492    | A | \   | all1357          | ORF        |
| Chromosome | 1611129 | A | G   | 480    | A | \   | all1357          | ORF        |

|            |         |   |     |        |   |     |                  |            |
|------------|---------|---|-----|--------|---|-----|------------------|------------|
| Chromosome | 1689791 | A | G/A | 446/93 | A | \   | all1427          | ORF        |
| Chromosome | 1720294 | G | G   | \      | A | 379 | all1463, alr1462 | Intergenic |
| Chromosome | 1740294 | G | A   | 405    | G | \   | all1477          | ORF        |
| Chromosome | 1740843 | T | C   | 455    | C | 401 | all1478          | ORF        |
| Chromosome | 1771480 | A | A   | \      | C | 412 | all1509          | ORF        |
| Chromosome | 1810252 | T | T   | \      | C | 443 | all1549          | ORF        |
| Chromosome | 1816020 | T | C   | 433    | T | \   | all1553          | ORF        |
| Chromosome | 1829742 | G | T   | 515    | G | \   | alr1564          | ORF        |
| Chromosome | 1839174 | C | T   | 447    | T | 386 | all1574, alr1575 | Intergenic |
| Chromosome | 1895931 | G | A   | 468    | A | 386 | alr1614          | ORF        |
| Chromosome | 1897575 | G | A   | 500    | A | 379 | alr1614          | ORF        |
| Chromosome | 1907745 | A | A   | \      | G | 370 | alr1619          | ORF        |
| Chromosome | 1908542 | T | C   | 460    | T | \   | alr1620          | ORF        |
| Chromosome | 1939174 | C | T   | 488    | C | \   | all1639          | ORF        |
| Chromosome | 1968465 | T | T   | \      | C | 342 | all1649          | ORF        |
| Chromosome | 1981387 | G | A   | 473    | A | 464 | alr1659          | ORF        |
| Chromosome | 1992410 | A | A   | \      | G | 389 | alr1669          | ORF        |
| Chromosome | 2008739 | G | A   | 480    | A | 432 | all1683          | ORF        |
| Chromosome | 2020785 | G | A   | 528    | A | 499 | all1691, all1692 | Intergenic |
| Chromosome | 2027656 | G | A   | 500    | G | \   | all1695          | ORF        |
| Chromosome | 2028469 | C | T   | 486    | C | \   | all1695          | ORF        |
| Chromosome | 2095482 | A | G   | 474    | A | \   | alr1742          | ORF        |
| Chromosome | 2103674 | A | A   | \      | G | 446 | asl1749          | ORF        |
| Chromosome | 2199111 | T | T   | \      | C | 455 | alr1833, alr1834 | Intergenic |
| Chromosome | 2203380 | C | T   | 488    | T | 456 | asl1839          | ORF        |
| Chromosome | 2212421 | C | C   | \      | T | 389 | all1849          | ORF        |
| Chromosome | 2232920 | C | T   | 465    | C | \   | alr1870          | ORF        |
| Chromosome | 2310473 | A | G   | 240    | A | \   | alr1926, alr1927 | Intergenic |
| Chromosome | 2348508 | A | T   | 433    | A | \   | alr1965, alr1966 | Intergenic |

|            |         |   |     |        |   |     |                  |            |
|------------|---------|---|-----|--------|---|-----|------------------|------------|
| Chromosome | 2359208 | T | C   | 420    | C | 410 | all1974          | ORF        |
| Chromosome | 2386615 | G | G   | \      | A | 421 | all1990          | ORF        |
| Chromosome | 2466963 | C | T   | 458    | T | 360 | all2058          | ORF        |
| Chromosome | 2479725 | T | G   | 460    | G | 440 | alr2073, all2072 | Intergenic |
| Chromosome | 2498543 | C | C   | \      | A | 244 | alr2090          | ORF        |
| Chromosome | 2498548 | T | T   | \      | C | 248 | alr2090          | ORF        |
| Chromosome | 2556356 | T | T   | \      | C | 463 | alr2130          | ORF        |
| Chromosome | 2571912 | A | A   | \      | G | 429 | alr2143          | ORF        |
| Chromosome | 2580643 | G | G   | \      | A | 385 | all2149          | ORF        |
| Chromosome | 2665829 | T | C   | 523    | C | 407 | all2221, all2222 | Intergenic |
| Chromosome | 2677570 | G | A   | 534    | G | \   | alr2233          | ORF        |
| Chromosome | 2756402 | A | G   | 462    | G | 355 | all2287          | ORF        |
| Chromosome | 2832449 | G | G   | \      | A | 401 | alr2350, all2349 | Intergenic |
| Chromosome | 2834963 | A | A   | \      | G | 435 | all2352          | ORF        |
| Chromosome | 2843120 | C | T   | 465    | C | \   | alr2361          | ORF        |
| Chromosome | 2856383 | T | C   | 462    | C | 358 | alr2373          | ORF        |
| Chromosome | 2871033 | C | C   | \      | T | 430 | all2384          | ORF        |
| Chromosome | 2902538 | G | G   | \      | A | 431 | alr2418          | ORF        |
| Chromosome | 2927969 | T | T   | \      | C | 395 | alr2434          | ORF        |
| Chromosome | 2966029 | C | C   | \      | T | 428 | alr2467          | ORF        |
| Chromosome | 2979695 | A | A   | \      | G | 436 | alr2481          | ORF        |
| Chromosome | 3067783 | A | G/A | 370/93 | A | \   | all2567          | ORF        |
| Chromosome | 3150434 | G | A   | 477    | A | 439 | all2635          | ORF        |
| Chromosome | 3164466 | T | C   | 414    | C | 426 | all2643          | ORF        |
| Chromosome | 3214501 | A | G   | 545    | G | 464 | all2655          | ORF        |
| Chromosome | 3244445 | A | G   | 406    | G | 424 | all2675, all2676 | Intergenic |
| Chromosome | 3280388 | A | G   | 447    | G | 404 | all2688          | ORF        |
| Chromosome | 3280989 | A | A   | \      | G | 422 | all2689          | ORF        |
| Chromosome | 3292733 | A | A   | \      | G | 408 | all2699          | ORF        |

|            |         |   |     |         |   |     |                  |            |
|------------|---------|---|-----|---------|---|-----|------------------|------------|
| Chromosome | 3299861 | A | G   | 436     | G | 366 | all2706          | ORF        |
| Chromosome | 3314107 | C | T   | 494     | T | 434 | alr2719, alr2718 | Intergenic |
| Chromosome | 3321812 | C | T   | 448     | T | 407 | alr2725          | ORF        |
| Chromosome | 3376560 | T | C   | 510     | C | 455 | asl2779, alr2780 | Intergenic |
| Chromosome | 3384352 | A | G   | 485     | G | 411 | alr2784, alr2785 | Intergenic |
| Chromosome | 3385448 | C | T   | 491     | T | 374 | alr2785          | ORF        |
| Chromosome | 3388341 | T | A   | 329     | A | 356 | all2787          | ORF        |
| Chromosome | 3404883 | C | T   | 469     | T | 435 | alr2800          | ORF        |
| Chromosome | 3439866 | T | C   | 479     | C | 445 | alr2824          | ORF        |
| Chromosome | 3449008 | C | C   | \       | T | 403 | alr2832          | ORF        |
| Chromosome | 3461181 | G | G   | \       | A | 433 | alr2840          | ORF        |
| Chromosome | 3461281 | T | C/T | 413/103 | T | \   | alr2840          | ORF        |
| Chromosome | 3522353 | C | T   | 487     | T | 314 | alr2884, all2883 | Intergenic |
| Chromosome | 3529532 | A | G   | 444     | G | 337 | all2891          | ORF        |
| Chromosome | 3553554 | T | T   | \       | C | 392 | all2911          | ORF        |
| Chromosome | 3561805 | T | T   | \       | C | 437 | alr2920, alr2921 | Intergenic |
| Chromosome | 3665879 | T | C   | 439     | C | 337 | asl3025          | ORF        |
| Chromosome | 3678170 | A | G   | 444     | A | \   | alr3037          | ORF        |
| Chromosome | 3678824 | A | G   | 466     | G | 436 | alr3037          | ORF        |
| Chromosome | 3682278 | C | T   | 407     | T | 439 | all3040, all3041 | Intergenic |
| Chromosome | 3707449 | A | G   | 424     | A | \   | alr3059          | ORF        |
| Chromosome | 3717999 | T | T   | \       | C | 407 | alr3068          | ORF        |
| Chromosome | 3902869 | T | C   | 476     | T | \   | all3232          | ORF        |
| Chromosome | 3997485 | T | C/T | 387/50  | T | \   | alr3311          | ORF        |
| Chromosome | 4004306 | C | T   | 434     | C | \   | all3314          | ORF        |
| Chromosome | 4054871 | T | T   | \       | C | 442 | alr3351          | ORF        |
| Chromosome | 4070477 | G | G   | \       | A | 340 | alr3363          | ORF        |
| Chromosome | 4071943 | T | T   | \       | C | 397 | alr3364          | ORF        |
| Chromosome | 4074557 | C | T   | 455     | T | 320 | alr3366, all3367 | Intergenic |

|            |         |   |     |         |   |     |                  |            |
|------------|---------|---|-----|---------|---|-----|------------------|------------|
| Chromosome | 4085038 | C | T   | 449     | T | 463 | all3375          | ORF        |
| Chromosome | 4096661 | T | C   | 469     | C | 375 | alr3385          | ORF        |
| Chromosome | 4105348 | A | A   | \       | G | 366 | alr3397          | ORF        |
| Chromosome | 4206630 | T | T   | \       | C | 416 | alr3491          | ORF        |
| Chromosome | 4211631 | G | A   | 490     | A | 365 | alr3497          | ORF        |
| Chromosome | 4219140 | A | G   | 486     | A | \   | all3503          | ORF        |
| Chromosome | 4283858 | A | G   | 453     | A | \   | alr3553, alr3554 | Intergenic |
| Chromosome | 4329437 | G | A   | 479     | A | 431 | alr3584          | ORF        |
| Chromosome | 4372460 | A | C   | 71      | C | 472 | alr3620          | ORF        |
| Chromosome | 4383161 | C | T/C | 517/59  | C | \   | all3632          | ORF        |
| Chromosome | 4429266 | A | G   | 294     | A | \   | alr3672, all3673 | Intergenic |
| Chromosome | 4524010 | G | G   | \       | A | 455 | all3746          | ORF        |
| Chromosome | 4542759 | A | A   | \       | G | 388 | alr3761          | ORF        |
| Chromosome | 4580258 | C | T   | 452     | C | \   | alr3789          | ORF        |
| Chromosome | 4591842 | G | A   | 500     | G | \   | alr3799, alr3800 | Intergenic |
| Chromosome | 4609347 | G | A   | 409     | G | \   | alr3811, alr3812 | Intergenic |
| Chromosome | 4624534 | A | A   | \       | G | 395 | alr3825          | ORF        |
| Chromosome | 4633553 | G | A   | 460     | A | 417 | alr3832, alr3833 | Intergenic |
| Chromosome | 4658414 | G | A   | 515     | G | \   | all3859          | ORF        |
| Chromosome | 4667926 | A | A   | \       | G | 460 | alr3867          | ORF        |
| Chromosome | 4692046 | G | A   | 455     | G | \   | all3891          | ORF        |
| Chromosome | 4707809 | A | G   | 522     | A | \   | all3903, alr3904 | Intergenic |
| Chromosome | 4708391 | A | A   | \       | G | 426 | alr3904          | ORF        |
| Chromosome | 4741099 | G | A   | 484     | A | 387 | all3927          | ORF        |
| Chromosome | 4834014 | G | A/G | 437/131 | G | \   | asl4014          | ORF        |
| Chromosome | 4835685 | C | T   | 490     | C | \   | alr4016          | ORF        |
| Chromosome | 4853972 | T | C   | 480     | C | 418 | alr4028          | ORF        |
| Chromosome | 4862032 | C | T   | 488     | T | 430 | all4035          | ORF        |
| Chromosome | 4930827 | T | T   | \       | C | 470 | all4092          | ORF        |

|            |         |   |     |        |   |     |                  |            |
|------------|---------|---|-----|--------|---|-----|------------------|------------|
| Chromosome | 4942838 | C | C   | \      | T | 396 | all4102          | ORF        |
| Chromosome | 4960654 | T | T   | \      | C | 418 | all4117          | ORF        |
| Chromosome | 4987803 | T | C   | 453    | T | \   | alr4141, all4142 | Intergenic |
| Chromosome | 5012714 | C | T   | 526    | T | 473 | alr4166          | ORF        |
| Chromosome | 5031775 | C | C   | \      | T | 389 | all4182          | ORF        |
| Chromosome | 5036789 | T | C   | 478    | C | 420 | all4188          | ORF        |
| Chromosome | 5053532 | T | T   | \      | C | 432 | alr4216          | ORF        |
| Chromosome | 5054846 | C | A   | 488    | C | \   | all4218          | ORF        |
| Chromosome | 5069810 | T | C   | 417    | C | 434 | all4233          | ORF        |
| Chromosome | 5072713 | A | G   | 513    | G | 361 | all4236          | ORF        |
| Chromosome | 5093978 | T | T   | \      | C | 397 | alr4247          | ORF        |
| Chromosome | 5096718 | A | G   | 452    | G | 378 | all4248          | ORF        |
| Chromosome | 5118388 | T | C   | 494    | C | 486 | alr4268          | ORF        |
| Chromosome | 5123906 | T | C   | 487    | T | \   | alr4273          | ORF        |
| Chromosome | 5128378 | T | C   | 473    | C | 467 | alr4275          | ORF        |
| Chromosome | 5130579 | T | T   | \      | C | 355 | alr4277          | ORF        |
| Chromosome | 5148689 | A | G/A | 376/85 | A | \   | all4294          | ORF        |
| Chromosome | 5220452 | C | T   | 484    | C | \   | all4358          | ORF        |
| Chromosome | 5268442 | G | A   | 461    | G | \   | alr4394          | ORF        |
| Chromosome | 5277885 | C | T   | 511    | C | \   | all4402          | ORF        |
| Chromosome | 5295867 | G | T   | 489    | G | \   | alr4417          | ORF        |
| Chromosome | 5299799 | G | A   | 541    | A | 397 | asr4421          | ORF        |
| Chromosome | 5366378 | A | C   | 466    | A | \   | all4480          | ORF        |
| Chromosome | 5376257 | T | C   | 532    | T | \   | alr4489          | ORF        |
| Chromosome | 5451412 | A | A   | \      | G | 457 | all4556          | ORF        |
| Chromosome | 5472869 | A | G   | 174    | A | \   | all4578          | ORF        |
| Chromosome | 5472870 | A | C   | 174    | A | \   | all4578          | ORF        |
| Chromosome | 5501951 | A | G   | 458    | G | 450 | alr4604          | ORF        |
| Chromosome | 5542778 | A | G   | 462    | G | 423 | all4639          | ORF        |

|            |         |   |     |        |   |     |                  |            |
|------------|---------|---|-----|--------|---|-----|------------------|------------|
| Chromosome | 5596861 | C | T   | 482    | T | 462 | all4690          | ORF        |
| Chromosome | 5636415 | T | T   | \      | C | 344 | all4729          | ORF        |
| Chromosome | 5638397 | A | G   | 465    | G | 391 | all4731          | ORF        |
| Chromosome | 5646409 | A | G   | 464    | G | 437 | alr4734, all4735 | Intergenic |
| Chromosome | 5656553 | A | G   | 493    | G | 461 | asl4743          | ORF        |
| Chromosome | 5677447 | G | G   | \      | T | 469 | all4763          | ORF        |
| Chromosome | 5718687 | A | G   | 427    | G | 387 | all4799          | ORF        |
| Chromosome | 5730046 | C | T   | 487    | T | 442 | alr4811, alr4812 | Intergenic |
| Chromosome | 5746803 | C | C   | \      | T | 420 | all4828          | ORF        |
| Chromosome | 5808428 | A | G   | 470    | G | 437 | alr4877          | ORF        |
| Chromosome | 5873706 | C | A   | 526    | C | \   | all4925          | ORF        |
| Chromosome | 5895688 | C | T   | 484    | C | \   | alr4938, alr4939 | Intergenic |
| Chromosome | 5930524 | C | C   | \      | T | 399 | all4968          | ORF        |
| Chromosome | 6040371 | T | T   | \      | C | 353 | alr5068          | ORF        |
| Chromosome | 6053276 | G | G   | \      | A | 398 | all5082, alr5081 | Intergenic |
| Chromosome | 6053727 | T | T   | \      | C | 381 | all5082, alr5081 | Intergenic |
| Chromosome | 6077149 | C | T   | 509    | C | \   | all5100, alr5101 | Intergenic |
| Chromosome | 6078691 | T | T   | \      | C | 406 | alr5101          | ORF        |
| Chromosome | 6085980 | G | A   | 491    | G | \   | all5105          | ORF        |
| Chromosome | 6087384 | G | T   | 443    | G | \   | all5106          | ORF        |
| Chromosome | 6103380 | G | G   | \      | A | 435 | all5113          | ORF        |
| Chromosome | 6150516 | C | T   | 478    | C | \   | all5153          | ORF        |
| Chromosome | 6239409 | G | A   | 531    | G | \   | alr5225          | ORF        |
| Chromosome | 6263798 | T | C   | 438    | C | 423 | alr5249          | ORF        |
| Chromosome | 6275081 | G | G   | \      | A | 377 | alr5259          | ORF        |
| Chromosome | 6276832 | G | A   | 527    | A | 367 | asr5261          | ORF        |
| Chromosome | 6352567 | C | T/C | 441/61 | C | \   | all5323          | ORF        |
| Chromosome | 6365449 | G | A/G | 426/92 | G | \   | alr5331          | ORF        |
| Chromosome | 6375751 | C | T   | 465    | C | \   | all5342          | ORF        |

|            |         |   |   |     |   |     |         |     |
|------------|---------|---|---|-----|---|-----|---------|-----|
| Chromosome | 6386500 | T | T | \   | C | 448 | alr5351 | ORF |
| Chromosome | 6387506 | A | G | 482 | G | 481 | alr5351 | ORF |

Note: HAU, substrain from Huazhong Agriculture University; IHB, substrain from Institute of Hydrobiology.

**Table R2. Transpositions and fragment deletions in genomes of substrains**

| substrain              | HAU                                             |                            | IHB                              |                            | HAU/IHB              | HAU/IHB/CPW                                              |
|------------------------|-------------------------------------------------|----------------------------|----------------------------------|----------------------------|----------------------|----------------------------------------------------------|
| mutation               | fragment deletions                              | lacked insertion sequences | fragment deletions               | lacked insertion sequences | acquired ISs         | short sequence stretches                                 |
| chromosome position    | 2030740 to 2031696                              | 1286797 to 1288267         | 4616790 to 4618012               | 1286797 to 1288267         | 3579748              | 1551763-1551764;<br>2243236-2243237 ;<br>4247463-4247464 |
| alpha plasmid position | 861 to 1715; 175281 to 176938; 312401 to 313185 | 242000 to 243358           | 97521 to 99371; 160056 to 161094 | 242000 to 243358           | 45585/504 56; 165178 | \                                                        |
| delta plasmid position | \                                               | 6937 to 8620               | \                                | 6937 to 8620               | \                    | \                                                        |
| gamma plasmid position | \                                               | \                          | \                                | \                          | 518; 25703           | \                                                        |

Note: HAU, substrain from Huazhong Agriculture University; IHB, substrain from Institute of Hydrobiology; CPW, substrain from C. Peter Wolk.



**Table R3. List of the locations of novelties in the genome of *Nostoc* sp. PCC 7120**

| Category        | Name  | Start   | Stop    | Strand | chromosome/plasmid | overlap with the mutant region |
|-----------------|-------|---------|---------|--------|--------------------|--------------------------------|
| Intergenic      | NG-1  | 3061381 | 3061743 | +      | Chromosome         | NO                             |
|                 | NG-2  | 50856   | 50945   | -      | Chromosome         | NO                             |
|                 | NG-3  | 2175325 | 2175567 | +      | Chromosome         | NO                             |
|                 | NG-4  | 4743923 | 4744180 | -      | Chromosome         | NO                             |
|                 | NG-5  | 291906  | 291977  | -      | Chromosome         | NO                             |
|                 | NG-6  | 3326403 | 3326579 | +      | Chromosome         | NO                             |
|                 | NG-7  | 6329546 | 6329734 | +      | Chromosome         | NO                             |
|                 | NG-8  | 1979    | 2275    | +      | zeta               | NO                             |
|                 | NG-9  | 28264   | 28458   | +      | delta              | NO                             |
| Different_frame | NG-10 | 6174084 | 6174314 | +      | Chromosome         | NO                             |
|                 | NG-11 | 1916410 | 1916619 | -      | Chromosome         | NO                             |
|                 | NG-12 | 1480942 | 1481019 | +      | Chromosome         | NO                             |
|                 | NG-13 | 3304145 | 3304204 | +      | Chromosome         | NO                             |
|                 | NG-14 | 2363297 | 2363404 | +      | Chromosome         | NO                             |
|                 | NG-15 | 41129   | 41383   | +      | delta              | NO                             |
| Opposite_strand | NG-16 | 1848810 | 1849055 | -      | Chromosome         | NO                             |
|                 | NG-17 | 3549321 | 3549479 | +      | Chromosome         | NO                             |
|                 | NG-18 | 1606753 | 1606842 | -      | Chromosome         | NO                             |
|                 | NG-19 | 5523306 | 5523383 | +      | Chromosome         | NO                             |
|                 | NG-20 | 3937924 | 3938082 | -      | Chromosome         | NO                             |
|                 | NG-21 | 552087  | 552458  | +      | Chromosome         | NO                             |
|                 | NG-22 | 3593954 | 3594163 | +      | Chromosome         | NO                             |
|                 | NG-23 | 3960188 | 3960316 | -      | Chromosome         | NO                             |
|                 | NG-24 | 1935534 | 1935599 | +      | Chromosome         | NO                             |
|                 | NG-25 | 3430865 | 3430978 | -      | Chromosome         | NO                             |
|                 | NG-26 | 955647  | 955844  | +      | Chromosome         | NO                             |

|            |         |         |         |         |            |            |
|------------|---------|---------|---------|---------|------------|------------|
| N-terminal | NG-27   | 5602199 | 5602834 | -       | Chromosome | NO         |
|            | revised | NG-28   | 5563575 | 5564075 | -          | Chromosome |
|            | NG-29   | 5476611 | 5478074 | -       | Chromosome | NO         |
|            | NG-30   | 6398394 | 6400049 | +       | Chromosome | NO         |
|            | NG-31   | 2398714 | 2399418 | -       | Chromosome | NO         |
|            | NG-32   | 557581  | 560325  | -       | Chromosome | NO         |
|            | NG-33   | 4387092 | 4388429 | -       | Chromosome | NO         |
|            | NG-34   | 9135    | 9635    | -       | Chromosome | NO         |
|            | NG-35   | 2806617 | 2807138 | -       | Chromosome | NO         |
|            | NG-36   | 4437976 | 4439016 | -       | Chromosome | NO         |
|            | NG-37   | 2720541 | 2721353 | +       | Chromosome | NO         |
|            | NG-38   | 2845637 | 2846836 | -       | Chromosome | NO         |
|            | NG-39   | 1927877 | 1929331 | +       | Chromosome | NO         |
|            | NG-40   | 4890360 | 4892165 | +       | Chromosome | NO         |
|            | NG-41   | 4449359 | 4450171 | +       | Chromosome | NO         |
|            | NG-42   | 183303  | 184679  | -       | Chromosome | NO         |
|            | NG-43   | 6285585 | 6287060 | +       | Chromosome | NO         |
|            | NG-44   | 161063  | 161677  | -       | Chromosome | NO         |
|            | NG-45   | 3040425 | 3041672 | +       | Chromosome | NO         |
|            | NG-46   | 3458379 | 3459263 | +       | Chromosome | NO         |
|            | NG-47   | 1892178 | 1892783 | -       | Chromosome | NO         |
|            | NG-48   | 1062152 | 1063162 | -       | Chromosome | NO         |
|            | NG-49   | 5141638 | 5142366 | -       | Chromosome | NO         |
|            | NG-50   | 4174473 | 4176371 | +       | Chromosome | NO         |
|            | NG-51   | 4113746 | 4114192 | +       | Chromosome | NO         |
|            | NG-52   | 439610  | 440356  | -       | Chromosome | NO         |
|            | NG-53   | 542438  | 543202  | -       | Chromosome | NO         |
|            | NG-54   | 1091458 | 1092084 | -       | Chromosome | NO         |
|            | NG-55   | 5566391 | 5567062 | -       | Chromosome | NO         |

|       |         |         |   |            |    |
|-------|---------|---------|---|------------|----|
| NG-56 | 752322  | 753362  | - | Chromosome | NO |
| NG-57 | 186587  | 188383  | - | Chromosome | NO |
| NG-58 | 5605481 | 5606170 | + | Chromosome | NO |
| NG-59 | 5317808 | 5318593 | - | Chromosome | NO |
| NG-60 | 1361762 | 1362160 | + | Chromosome | NO |
| NG-61 | 3795929 | 3796582 | + | Chromosome | NO |
| NG-62 | 5073517 | 5074065 | - | Chromosome | NO |
| NG-63 | 4949471 | 4950196 | - | Chromosome | NO |
| NG-64 | 5174268 | 5175236 | + | Chromosome | NO |
| NG-65 | 6062857 | 6064005 | - | Chromosome | NO |
| NG-66 | 397206  | 398111  | + | Chromosome | NO |
| NG-67 | 5108554 | 5109243 | + | Chromosome | NO |
| NG-68 | 4660695 | 4662368 | - | Chromosome | NO |
| NG-69 | 6134827 | 6136002 | - | Chromosome | NO |
| NG-70 | 903541  | 905127  | - | Chromosome | NO |
| NG-71 | 5046358 | 5046708 | - | Chromosome | NO |
| NG-72 | 567494  | 568564  | + | Chromosome | NO |
| NG-73 | 2090923 | 2091618 | + | Chromosome | NO |
| NG-74 | 3936567 | 3937862 | + | Chromosome | NO |
| NG-75 | 3754820 | 3755926 | + | Chromosome | NO |
| NG-76 | 2851805 | 2852293 | - | Chromosome | NO |
| NG-77 | 3834074 | 3834370 | + | Chromosome | NO |
| NG-78 | 3121525 | 3122052 | + | Chromosome | NO |
| NG-79 | 1335319 | 1335696 | + | Chromosome | NO |
| NG-80 | 2161853 | 2162545 | - | Chromosome | NO |
| NG-81 | 940332  | 940649  | - | Chromosome | NO |
| NG-82 | 6403133 | 6403798 | - | Chromosome | NO |
| NG-83 | 6054759 | 6057398 | + | Chromosome | NO |
| NG-84 | 5105966 | 5106448 | - | Chromosome | NO |

|        |         |         |   |            |    |
|--------|---------|---------|---|------------|----|
| NG-85  | 2454539 | 2455384 | + | Chromosome | NO |
| NG-86  | 3232857 | 3233654 | + | Chromosome | NO |
| NG-87  | 2639519 | 2640103 | - | Chromosome | NO |
| NG-88  | 3580698 | 3581294 | + | Chromosome | NO |
| NG-89  | 51286   | 53541   | - | Chromosome | NO |
| NG-90  | 5499142 | 5499570 | + | Chromosome | NO |
| NG-91  | 2251178 | 2252299 | + | Chromosome | NO |
| NG-92  | 4854080 | 4855237 | + | Chromosome | NO |
| NG-93  | 4967988 | 4969247 | + | Chromosome | NO |
| NG-94  | 5746427 | 5746699 | - | Chromosome | NO |
| NG-95  | 3341288 | 3342556 | + | Chromosome | NO |
| NG-96  | 623032  | 623289  | + | Chromosome | NO |
| NG-97  | 5788304 | 5791381 | - | Chromosome | NO |
| NG-98  | 290858  | 291880  | - | Chromosome | NO |
| NG-99  | 5699561 | 5700901 | + | Chromosome | NO |
| NG-100 | 57260   | 57430   | - | gamma      | NO |
| NG-101 | 84271   | 85470   | + | alpha      | NO |

## Reference

1. Kaneko T, Nakamura Y, Wolk CP, Kuritz T, Sasamoto S, Watanabe A, Iriguchi M, Ishikawa A, Kawashima K, Kimura T, Kishida Y, Kohara M, Matsumoto M, Matsuno A, Muraki A, Nakazaki N, Shimpo S, Sugimoto M, Takazawa M, Yamada M, Yasuda M, Tabata S. 2001. Complete genomic sequence of the filamentous nitrogen-fixing cyanobacterium *Anabaena* sp. strain PCC 7120. *DNA Res* 8:205-13; 227-53.
2. Everaert C, Luypaert M, Maag JLV, Cheng QX, Dinger ME, Hellemans J, Mestdagh P. 2017. Benchmarking of RNA-sequencing analysis workflows using whole-transcriptome RT-qPCR expression data. *Sci Rep* 7:1559.
3. Robert C, Watson M. 2015. Errors in RNA-Seq quantification affect genes of relevance to human disease. *Genome Biol* 16:177.
4. de Sousa Abreu R, Penalva LO, Marcotte EM, Vogel C. 2009. Global signatures of protein and mRNA expression levels. *Mol Biosyst* 5:1512-26.
5. Vogel C, Marcotte EM. 2012. Insights into the regulation of protein abundance from proteomic and transcriptomic analyses. *Nat Rev Genet* 13:227-32.
6. Barrick JE, Yu DS, Yoon SH, Jeong H, Oh TK, Schneider D, Lenski RE, Kim JF. 2009.

Genome evolution and adaptation in a long-term experiment with *Escherichia coli*. *Nature* 461:1243-7.

7. Shi L, Derouiche A, Pandit S, Rahimi S, Kalantari A, Futo M, Ravikumar V, Jers C, Mokkaapati V, Vlahoviček K, Mijakovic I. 2020. Evolutionary Analysis of the *Bacillus subtilis* Genome Reveals New Genes Involved in Sporulation. *Mol Biol Evol* 37:1667-1678.
8. Kanesaki Y, Shiwa Y, Tajima N, Suzuki M, Watanabe S, Sato N, Ikeuchi M, Yoshikawa H. 2012. Identification of substrain-specific mutations by massively parallel whole-genome resequencing of *Synechocystis* sp. PCC 6803. *DNA Res* 19:67-79.
9. Krug K, Carpy A, Behrends G, Matic K, Soares NC, Macek B. 2013. Deep coverage of the *Escherichia coli* proteome enables the assessment of false discovery rates in simple proteogenomic experiments. *Mol Cell Proteomics* 12:3420-30.
10. Pettersen VK, Steinsland H, Wiker HG. 2015. Improving genome annotation of enterotoxigenic *Escherichia coli* TW10598 by a label-free quantitative MS/MS approach. *Proteomics* 15:3826-34.
11. Ravikumar V, Nalpas NC, Anselm V, Krug K, Lenuzzi M, Šestak MS, Domazet-Lošo T, Mijakovic I, Macek B. 2018. In-depth analysis of *Bacillus subtilis* proteome identifies new ORFs and traces the evolutionary history of modified proteins. *Sci Rep* 8:17246.

August 16, 2021

Dr. Feng Ge  
Institute of Hydrobiology, Chinese Academy of Sciences  
Wuhan  
China

Re: Spectrum00490-21R1 (Proteogenomic analysis provides novel insight into genome annotation and nitrogen metabolism in *Nostoc* sp. PCC 7120)

Dear Dr. Feng Ge:

Thank you for your detailed modifications to the manuscript. Please note that while you have provided accession numbers to data, you should provide the following in a "Data Availability" paragraph at the end of the Materials and Methods section of full-length articles (or at the end of the text in shorter article types): data description, name of the repository, and DOIs or accession numbers.

Your manuscript has been accepted, and I am forwarding it to the ASM Journals Department for publication. You will be notified when your proofs are ready to be viewed.

The ASM Journals program strives for constant improvement in our submission and publication process. Please tell us how we can improve your experience by taking this quick [Author Survey](#).

As an open-access publication, Spectrum receives no financial support from paid subscriptions and depends on authors' prompt payment of publication fees as soon as their articles are accepted. You will be contacted separately about payment when the proofs are issued; please follow the instructions in that e-mail. Arrangements for payment must be made before your article is published. For a complete list of **Publication Fees**, including supplemental material costs, please visit our [website](#).

Corresponding authors may [join or renew ASM membership](#) to obtain discounts on publication fees. Need to upgrade your membership level? Please contact Customer Service at [Service@asmusa.org](mailto:Service@asmusa.org).

Thank you for submitting your paper to Spectrum.

Sincerely,

Vincent Deneff  
Editor, Microbiology Spectrum

Journals Department  
American Society for Microbiology  
1752 N St., NW  
Washington, DC 20036

E-mail: [spectrum@asmusa.org](mailto:spectrum@asmusa.org)

Table S6: Accept

Table S4: Accept

Table S1: Accept

Table S8: Accept

Table S9: Accept

Table S5: Accept

Table S2: Accept

Table S3: Accept

Figure S1-S6: Accept

Table S7: Accept
