# Supplementary material for: Proteogenomic Analysis Provides Novel Insight into Genome Annotation and Nitrogen Metabolism in Nostoc sp. PCC 7120
Source: PubMed Central journal article supplement (PMC8557916; doi:10.1128/spectrum.00490-21), 2021-09-15
Supplement: spectrum00490-21_supp_10_seq9.pdf [file spectrum00490-21_supp_10_seq9.pdf]

## Supplemental Figures

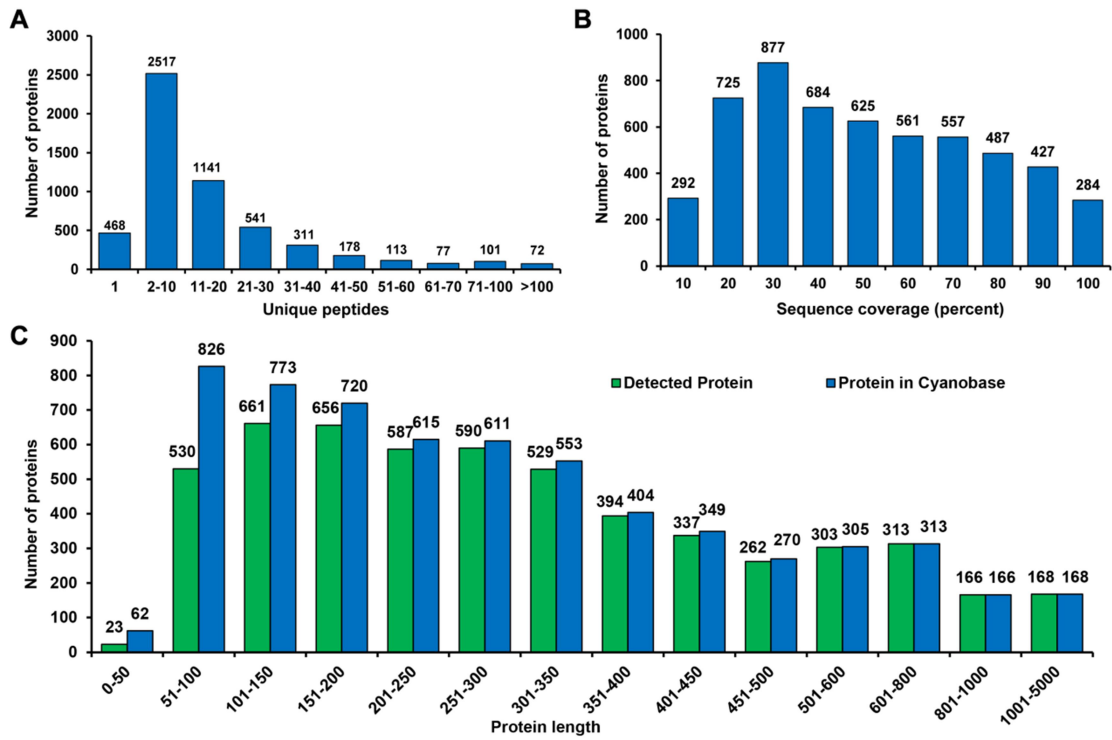

**Figure S1. Overview of proteomic data.**

**A.** Distribution of the number of unique peptides for all identified proteins. **B.** Distribution of the sequence coverage for all identified proteins. **C.** Protein length distribution of identified proteins.



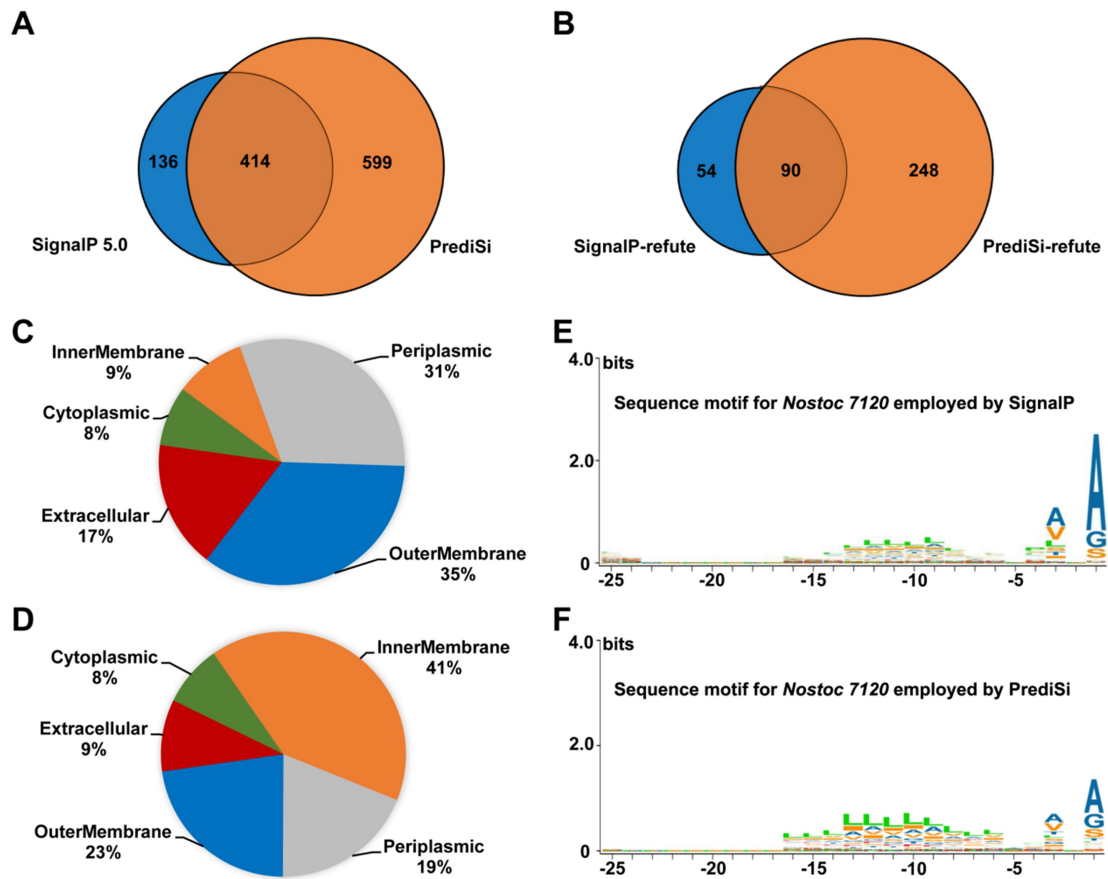

**Figure S3. Signal peptide prediction in *Nostoc 7120*.**

**A.** Venn diagram showing the number of signal peptides predictions by PrediSi and SignalP. **B.** Number of signal peptide predictions by SignalP (25) and PrediSi (110) refuted according to the signal cleavage site of the identified peptides upstream. **C.** Subcellular localization of identified proteins containing signal peptides predicted by SignalP 5.0. **D.** Subcellular localization of identified proteins containing signal peptides predicted by PrediSi. **E.** Motif of signal peptides predicted by SignalP 5.0. **F.** Motif of signal peptides predicted by PrediSi.

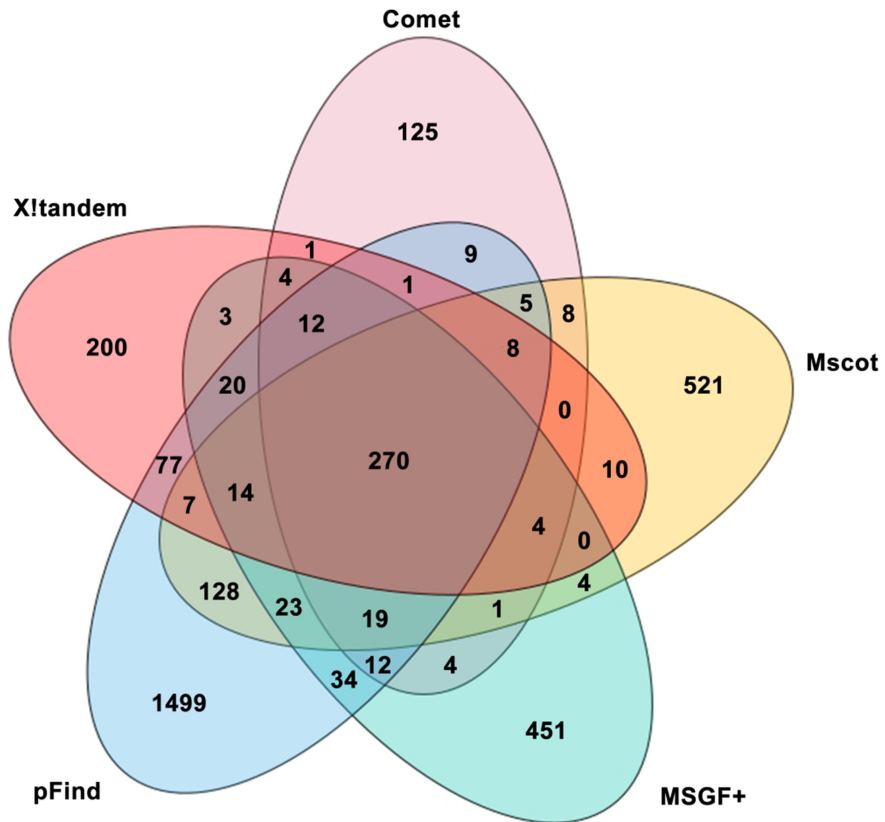

Figure S4. Venn diagram of novel peptides identified by different search engines.

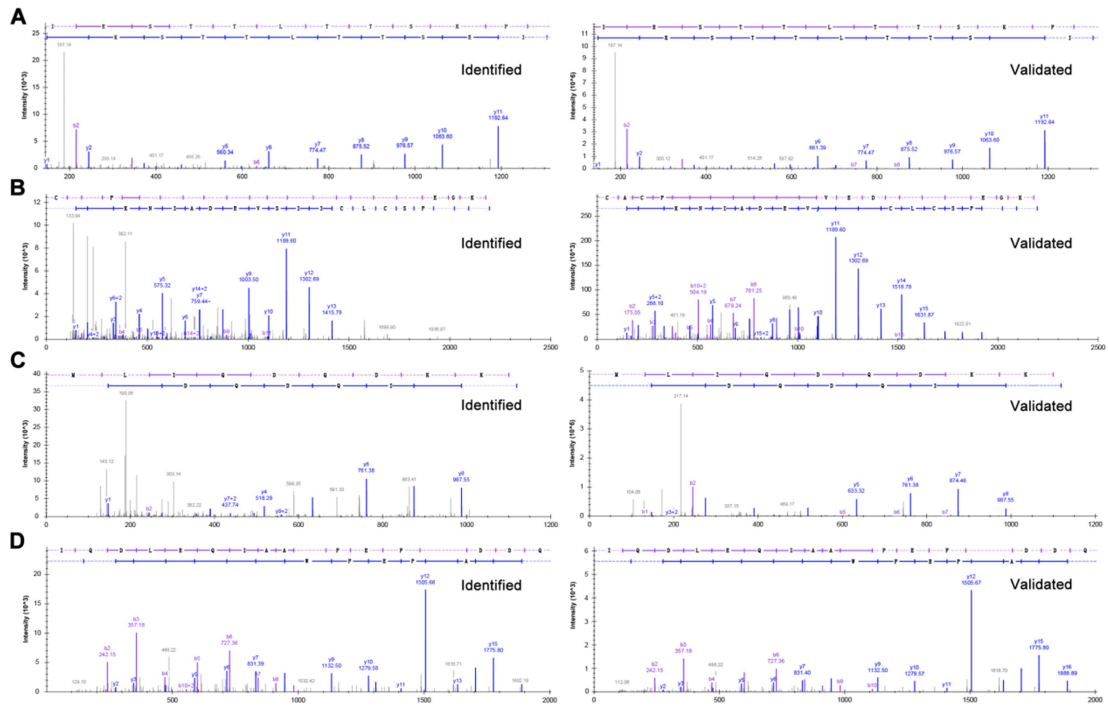

**Figure S5. Validation of novel peptides by comparing the MS spectra of the peptides identified from proteogenomic analysis (Identified) to those of synthetic peptides (Validated).**

A. MS spectra of peptides from a novel gene located in the intergenic region. B. MS spectra of peptides from a novel gene located on the opposite strand. C. MS spectra of peptides from a revised gene of *alr5269* with N-terminal extension. D. MS spectra of peptide from a revised gene of *all0273* with N-terminal extension with a nontraditional initiation codon (ATT).

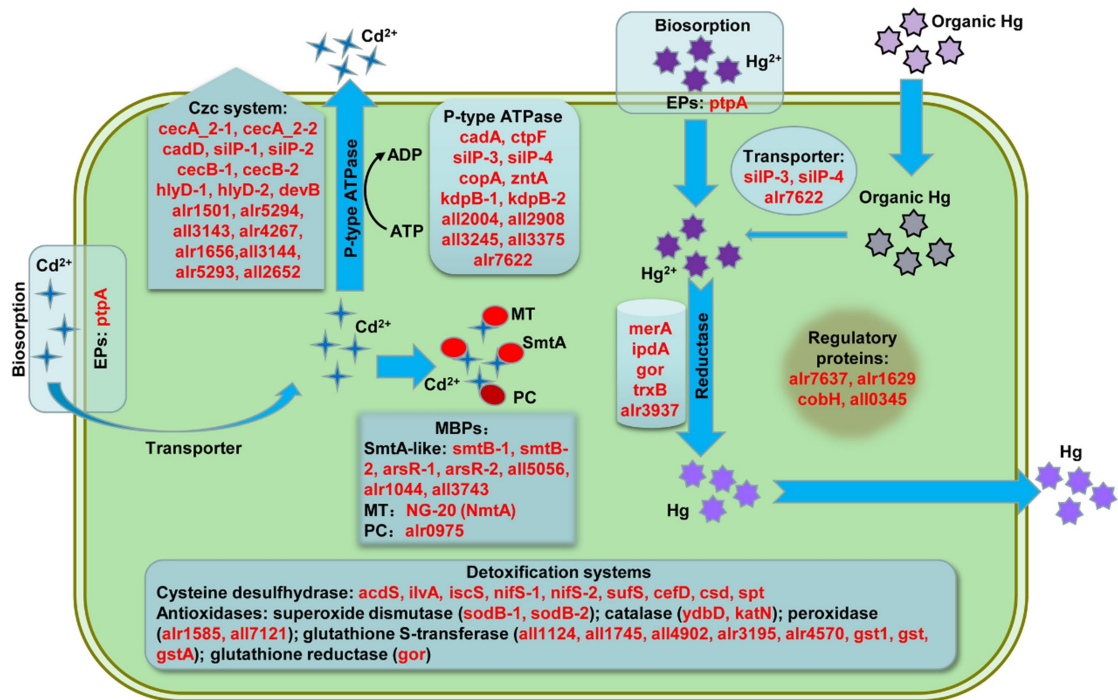

**Figure S6. Schematic diagram of Cd- and Hg-related proteins in *Nostoc* 7120**

The Cd- and Hg-related proteins identified in our proteogenomic analysis are highlighted in red.
